# Supplementary material for: Discovery of long-range inhibitory signaling to ensure single axon formation
Source: PubMed Central journal article supplement (PMC5484694; doi:10.1038/s41467-017-00044-2), 2017-06-26
Supplement: 41467_2017_44_MOESM1_ESM.pdf [file 41467_2017_44_MOESM1_ESM.pdf]

File Name: Supplementary Information

Description: Supplementary Figures and Supplementary Tables

File Name: Supplementary Movie 1

Description: **Local application of NT-3 generates long-range Ca<sup>2+</sup> waves.** A Ca<sup>2+</sup> indicator (Cal-520) was loaded into hippocampal neurons at 3 DIV. The pseudocolored image represents the concentration of Ca<sup>2+</sup> after local application of PBS to the axon terminal. Frames were obtained every 2 sec.

File Name: Supplementary Movie 2

Description: **Local application of NT-3 generates long-range Ca<sup>2+</sup> waves.** A Ca<sup>2+</sup> indicator (Cal-520) was loaded into hippocampal neurons at 3 DIV. The pseudocolored image represents the concentration of Ca<sup>2+</sup> after local application of NT-3 to the axon terminal. Frames were obtained every 2 sec.

File Name: Supplementary Movie 3

Description: **Spatio-temporal dynamics of RhoA activation in hippocampal neurons.** Raichu-RhoA-CR was transfected into hippocampal neurons at 3 to 4 DIV. The pseudocolored image represents the FRET efficiency after local application of PBS to the axon terminal. Frames were obtained every 20 sec.

File Name: Supplementary Movie 4

Description: **Spatio-temporal activation of RhoA in hippocampal neurons.** Raichu-RhoA-CR was transfected into hippocampal neurons at 3 to 4 DIV. The pseudocolored image represents the FRET efficiency after local application of NT-3 to the axon terminal. Frames were obtained every 20 sec.

File Name: Supplementary Movie 5

Description: **Photoactivation of Rho-kinase induces membrane blebbing and cell contraction.** mCherry-Rho-kinase-CAT-Zdk1 was co-transfected with NTOM20-LOV2 into HeLa cells. Photoactivation of LOVTRAP Rho-kinase was accomplished by irradiating intermittently (5 sec on/off cycle) for 30 minutes.

File Name: Supplementary Movie 6

Description: **Photoactivation of LOVTRAP RhoA/Rho-kinase induces minor neurite retraction.** mCherry-Zdk1 (LOVTRAP-Cont) was cotransfected with NTOM20-LOV2 into hippocampal neurons at 3 to 4 DIV. The cell body within a 20- $\mu$ m square was irradiated every 5 sec. Frames were also obtained every 5 sec.

File Name: Supplementary Movie 7

Description: **Photoactivation of LOVTRAP RhoA/Rho-kinase induces minor neurite retraction.** A kinase dead (KD) mutant of LOVTRAP Rho-kinase was transfected into hippocampal neurons at 3 to 4 DIV. The cell body within a 20- $\mu$ m square was irradiated every 5 sec. Frames were also obtained every 5 sec.

File Name: Supplementary Movie 8

Description: **Photoactivation of LOVTRAP RhoA/Rho-kinase induces minor neurite retraction.** LOVTRAP-Rho-kinase was transfected into hippocampal neurons at 3 to 4 DIV. The cell body within a 20- $\mu$ m square was irradiated every 5 sec. Frames were also obtained every 5 sec.

File Name: Supplementary Movie 9

Description: **Local application of Rho-kinase inhibitor to the minor neurite induces neurite outgrowth.** DMSO was locally applied to a minor neurite of a polarized neuron. Frames were also obtained every 5 min.

File Name: Supplementary Movie 10

Description: **Local application of Rho-kinase inhibitor to the minor neurite induces neurite outgrowth.** Rho-kinase inhibitor (Y-27632) was locally applied to a minor neurite of a polarized neuron. Frames were also obtained every 5 min.

File Name: Peer Review File

Description:

## Supplementary information

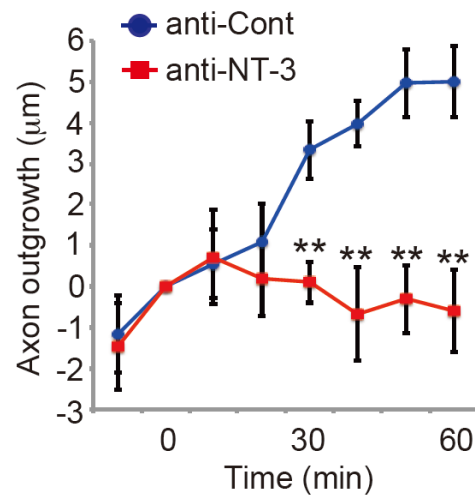

**Supplementary Figure 1. NT-3 derived from cultured neurons is required for axon formation in stage 3 cultured hippocampal neurons** Local inhibition of NT-3 suppressed axonal elongation. Time course of changes in the lengths of the axon from a single neuron locally exposing with anti-Cont (blue) or anti-NT-3 (red) (anti-Cont= 13, anti-NT-3= 13 neurons from 3 independent experiments). Error bars represent SEM. \*\*P < 0.01.

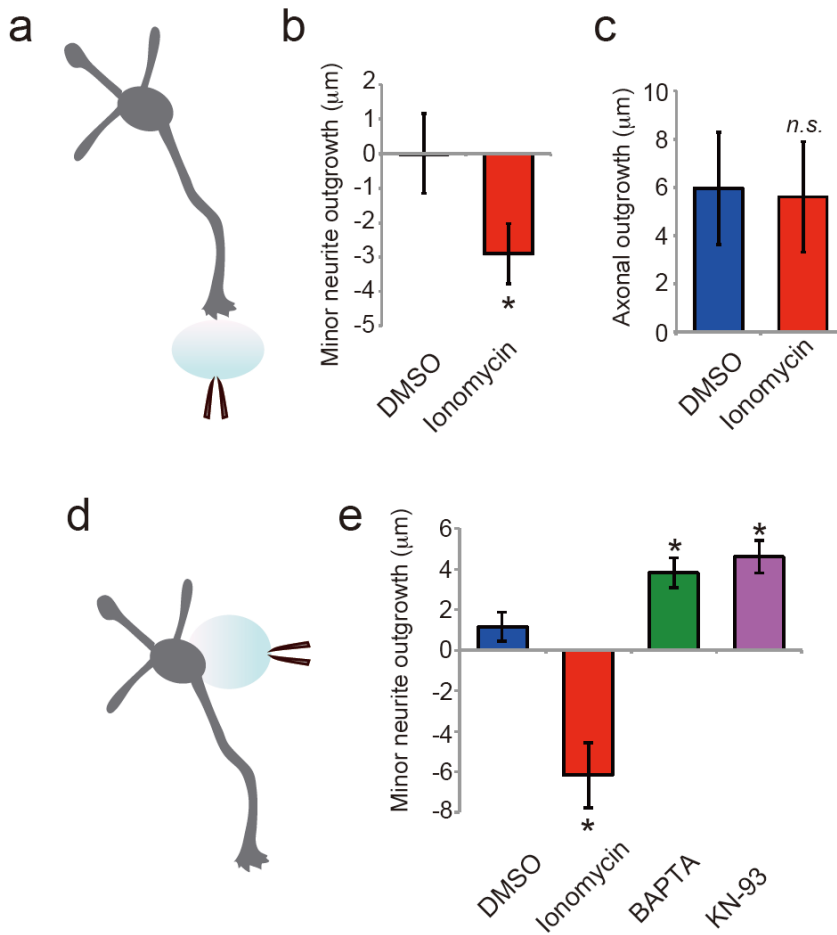

**Supplementary Figure 2. Local elevation of  $\text{Ca}^{2+}$  signaling at the cell body regulates neuronal polarity**  
**(a)** Local application of a  $\text{Ca}^{2+}$  ionophore to an axon induced minor neurite retraction. DMSO or a  $\text{Ca}^{2+}$  ionophore (ionomycin) was locally applied to the axon of a polarized hippocampal neuron. **(b-c)** Minor neurite outgrowth and axonal outgrowth were measured (DMSO= 67, ionomycin= 30 neurites from 3 independent experiments). **(d-e)** Local application of a  $\text{Ca}^{2+}$  ionophore or  $\text{Ca}^{2+}$  signaling inhibitors to the cell body regulated minor neurite outgrowth. DMSO, ionomycin, BAPTA or KN-93 was locally applied to the cell body of a polarized hippocampal neuron. Minor neurite outgrowth was measured (DMSO=59, ionomycin=33, BAPTA= 24, KN-93= 21 neurites from 3 independent experiments). Error bars represent SEM. \* $P < 0.05$  and \*\* $P < 0.01$ .

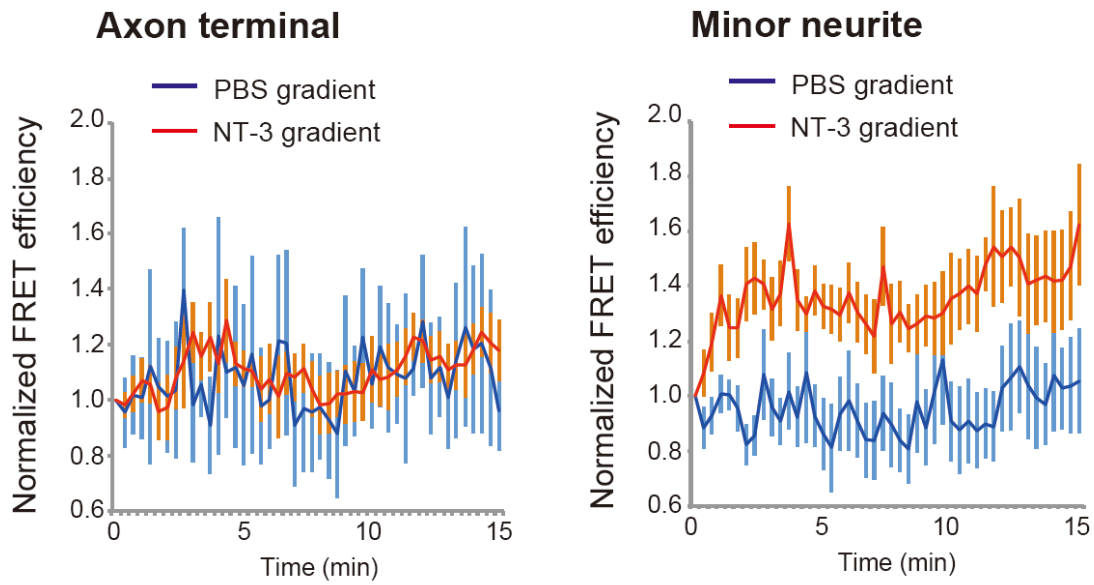

**Supplementary Figure 3. Spatio-temporal activation of RhoA by local application of NT-3 in neurons** PBS (blue) or NT-3 (red) was locally applied to an axon terminal of a hippocampal neuron expressing Raichu-RhoA-CR. Time course of changes in FRET efficiency in the axon terminal (left) and the minor neurite (right). Error bars represent the SEM.

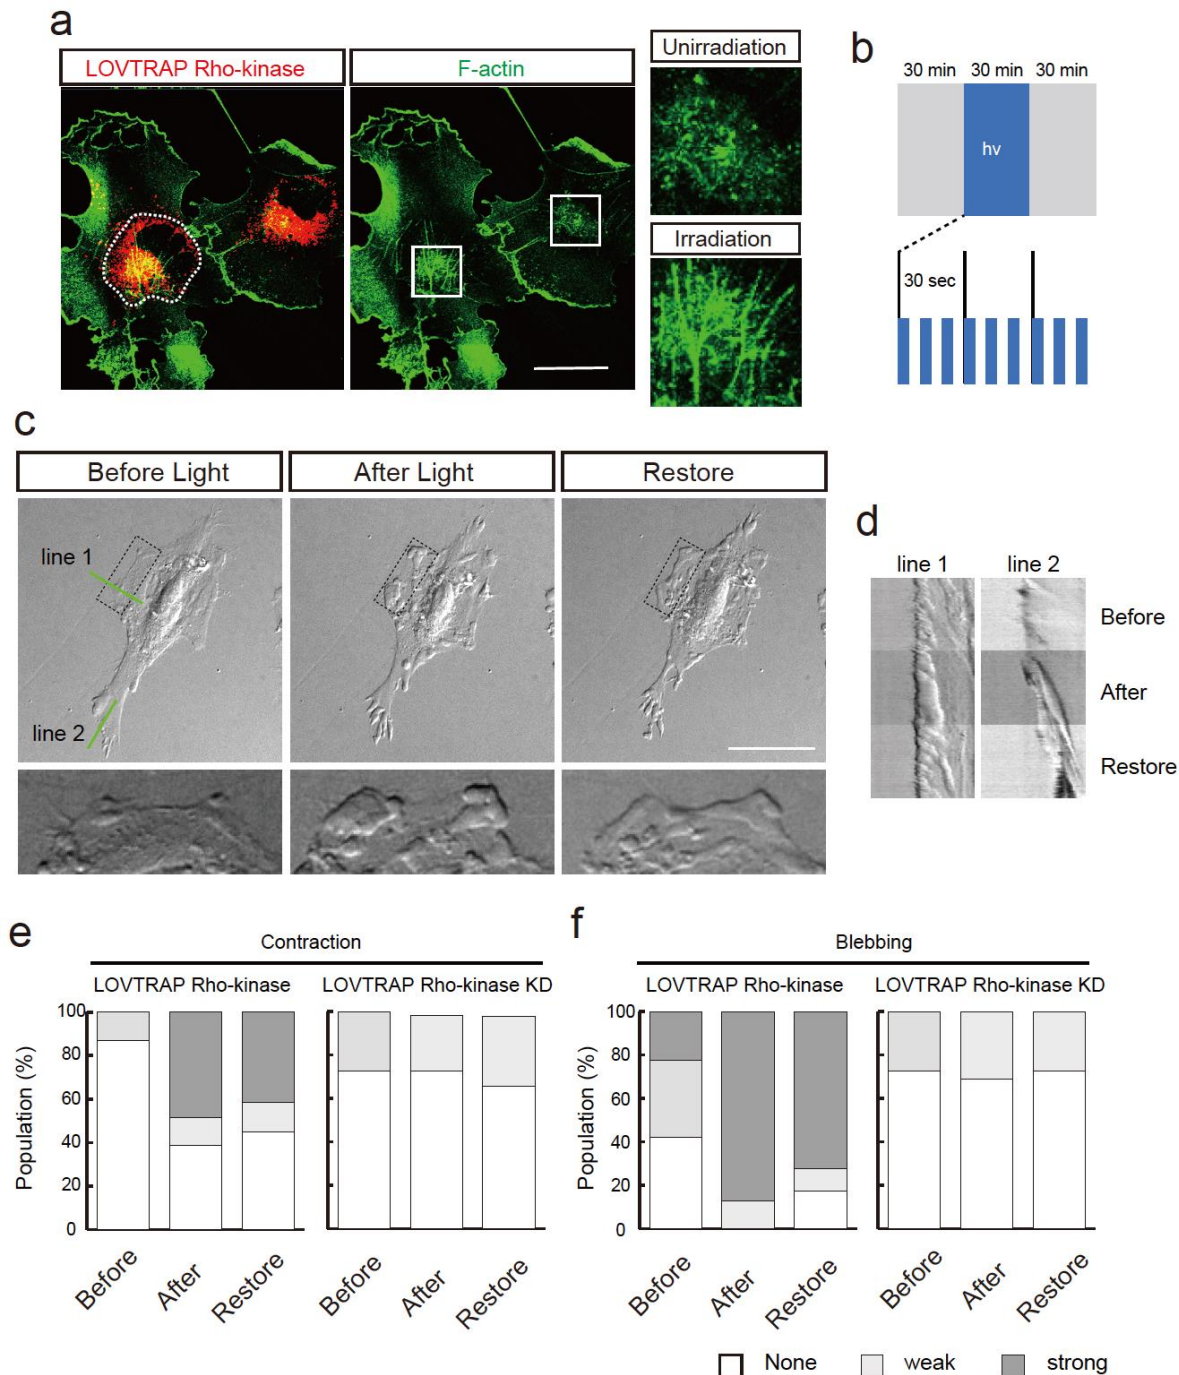

**Supplementary Figure 4. Characterization of LOVTRAP-Rho-kinase** (a) LOVTRAP-Rho-kinase induced stress-fiber formation. COS-7 cells expressing LOVTRAP-Rho-kinase were illuminated at 488 nm in the perinuclear region (dotted lines) for 30 min and then immunostained with Alexa-Phalloidin (green). Scale bars, 50  $\mu$ m. (b) Experimental design. HeLa cells expressing LOVTRAP-Rho-kinase were imaged for 30 min prior to photoactivation. Photoactivation of LOVTRAP-Rho-kinase was accomplished by irradiating intermittently (5 sec on/off cycle) for 30 min. Following photoactivation, the cells were imaged for an additional 30 min. hv, irradiation. (c) Irradiation of HeLa cells expressing LOVTRAP-Rho-kinase. High-magnification images of the area indicated by the dotted lines are presented. Scale bars, 40  $\mu$ m. (d) Kymographs of the membrane (line 1 or line 2) during observation. (e-f) Percentage of cells exhibiting contraction (e) or membrane blebbing (f).

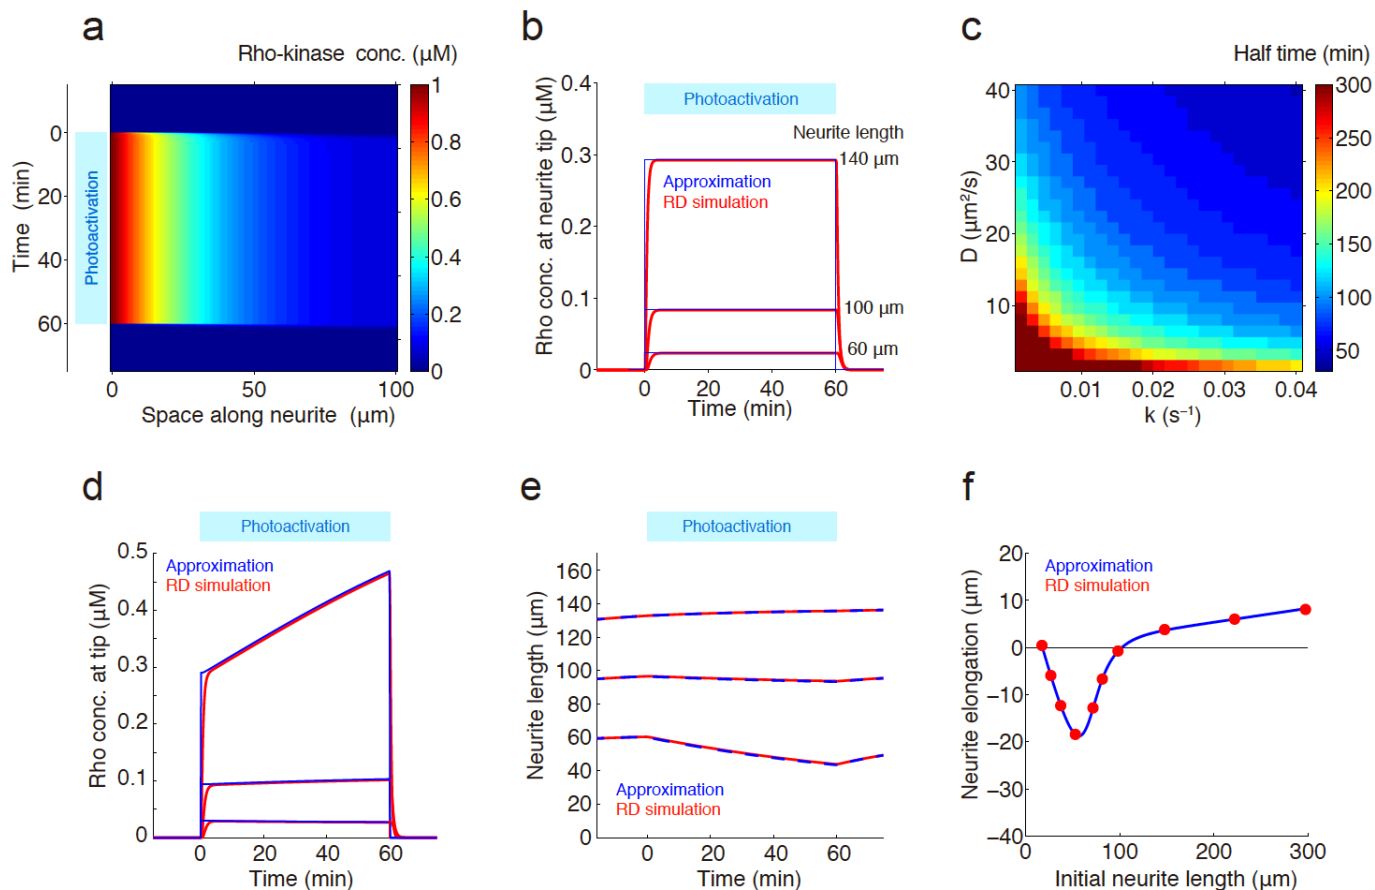

**Supplementary Figure 5. Reaction-diffusion (RD) simulation without the steady state approximation**

(a, b, c) Reaction-diffusion process of the Rho-kinase was simulated, without the steady state approximation, along a neurite of fixed length ( $100 \mu\text{m}$ ). (a) The heat map represents a spatiotemporal profile of the Rho-kinase concentration in response to the photoactivation. (b) RD simulation as in (a) and approximated simulation as in Fig. 4 were compared with various lengths of neurites. Red and blue lines indicate temporal changes in the Rho-kinase concentration at a neurite tip, which were calculated by the RD simulation as in (a) and by equation (1), respectively. (c) The time required for Rho-kinase concentration at a neurite tip ( $100 \mu\text{m}$ ) to reach half the stationary value from the onset of photoactivation was evaluated upon varying the inactivation/degradation rate,  $k$ , and the diffusion rate,  $D$ . (d, e, f) RD process of the Rho-kinase was simulated along a moving neurite. (d) Red and blue lines indicate the Rho-kinase concentration at a neurite tip simulated by the RD simulation and the approximated simulation, respectively. (e) Red and blue lines indicate the neurite lengths simulated by RD simulation and the approximated simulation, respectively. (f) Blue line indicates the relationship between initial neurite length and LOVTRAP-Rho-kinase-dependent neurite retraction, which is the same as Fig. 4f. The relationship was also calculated by the RD simulation (red dots).

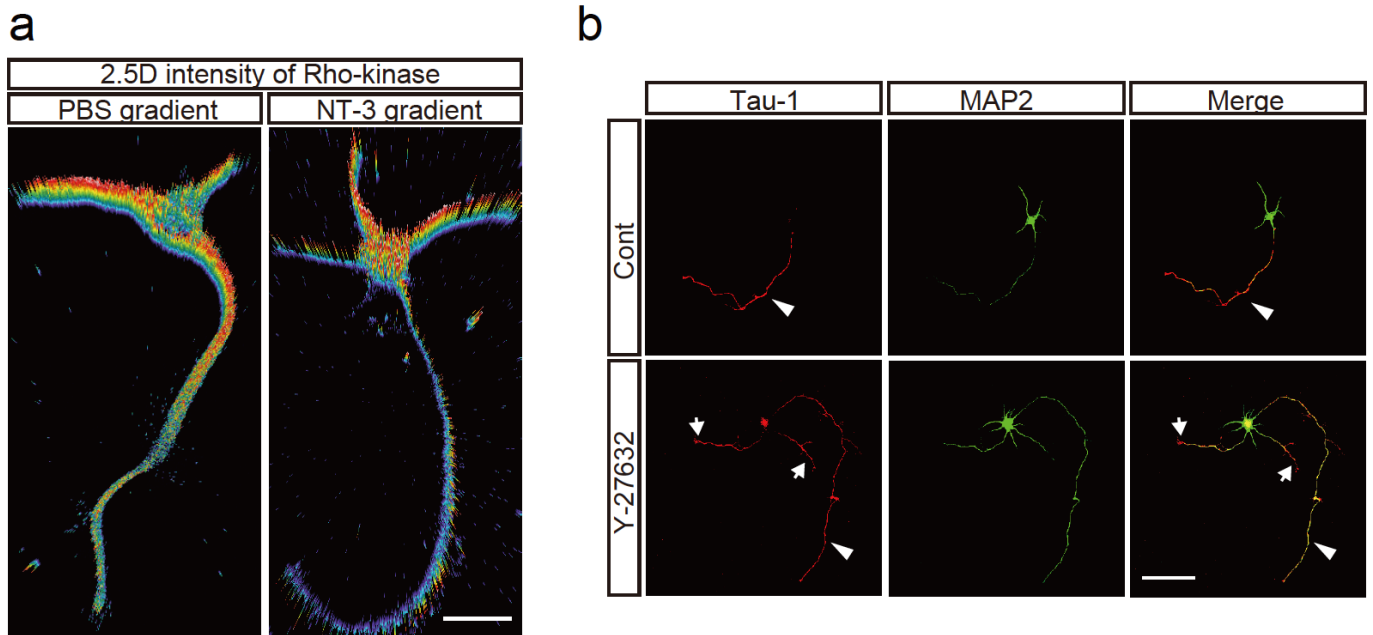

**Supplementary Figure 6. Spatial distribution of Rho-kinase in hippocampal neurons and Rho-kinase regulates the maintenance of future dendrite identity** (a) PBS (left panels) or NT-3 (right panels) was applied locally to the growth cone of the axon at 3 DIV. Neurons were immunostained with an anti-Rho-kinase antibody. The amount of Rho-kinase was analyzed by 2.5D reconstruction. Scale bars, 10  $\mu$  m. (b) Hippocampal neurons were treated at 3 DIV with DMSO (top) or Y-27632 (bottom) for 48 h. The neurons were co-immunostained at 5 DIV with anti-Tau-1 (red) and anti-MAP2 (green) antibodies. Multiple axons (arrows) grew out from the distal tips of the minor neurites (future dendrites) of a polarized neuron. The white arrowheads indicate the original axon.



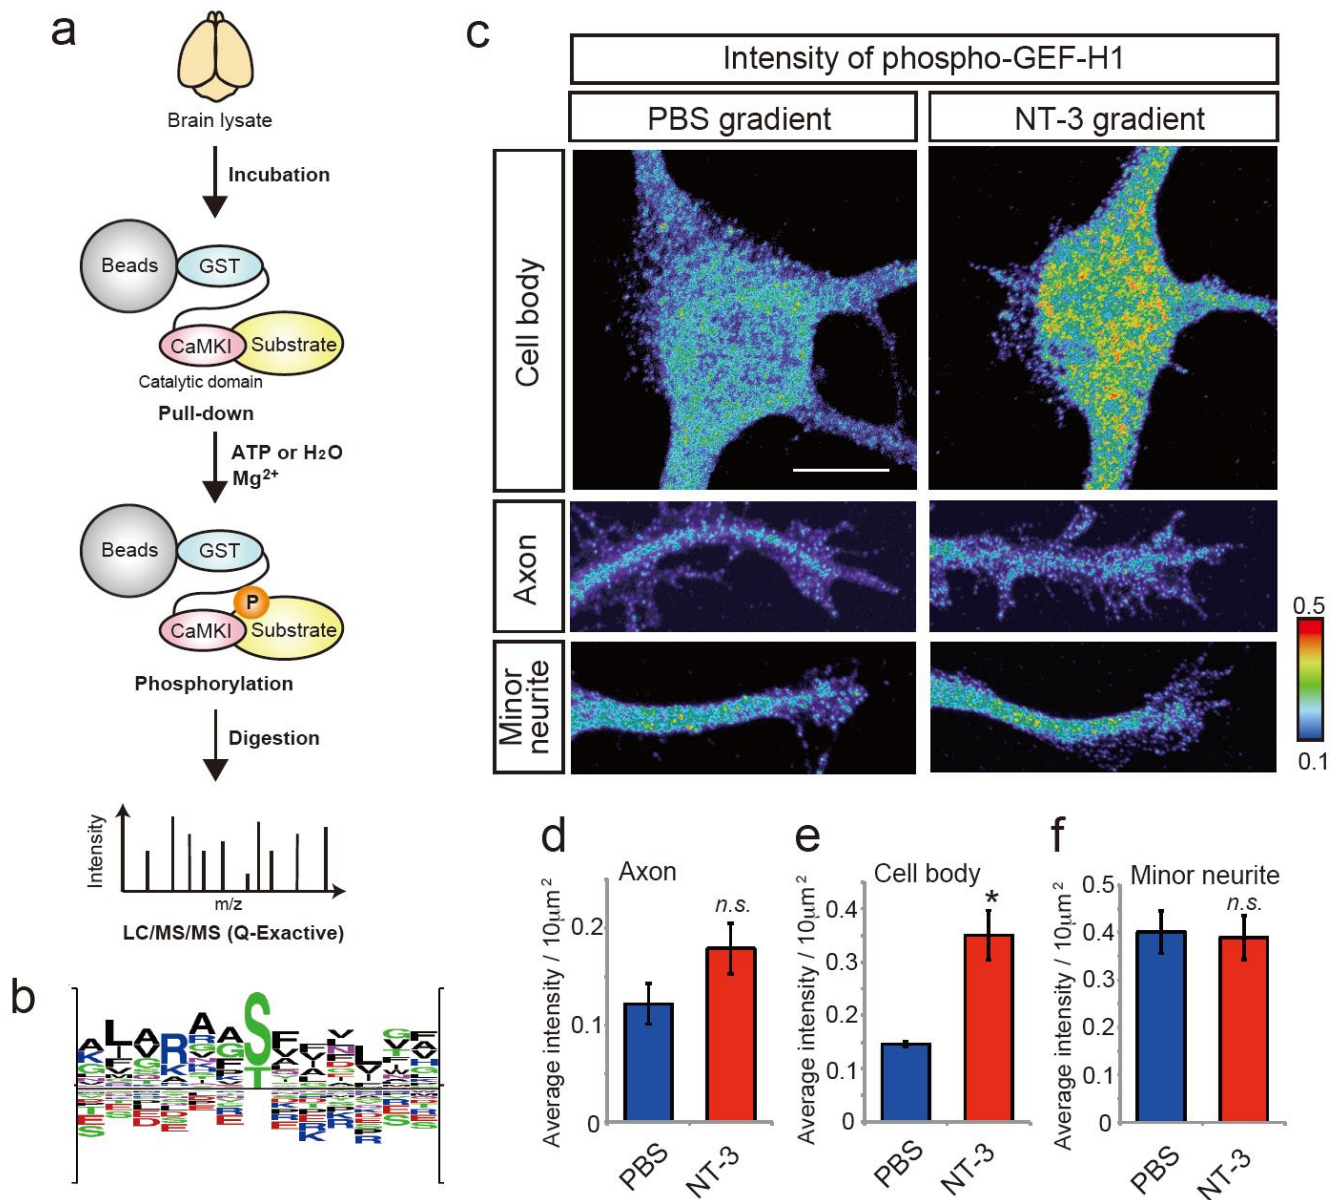

**Supplementary Figure 7. GEF-H1 was identified as a novel substrate of CaMKI using the KISS method** (a) Brain lysate was incubated with glutathione Sepharose beads coated with a GST-tagged CaMKI-cat to form a kinase-substrate complex. The bound proteins were incubated with or without ATP and Mg<sup>2+</sup>. The samples were subjected to LC/MS/MS analysis. (b) Motif logo of candidate phosphopeptides identified from the CaMKI screening using Logo Generators (<http://www.phosphosite.org>). (c) Spatial distribution of phosphorylated GEF-H1 at Thr103 in hippocampal neurons. PBS (left panels) or NT-3 (right panels) was applied locally to the growth cone of the axon at 3 DIV. Neurons were immunostained with an anti-pT103 antibody. The pseudocolor images represent the amounts of phospho-GEF-H1 in the cell body (top), axon (middle) and minor neurite (bottom). Scale bars, 10 μm. (d-f) The fluorescence intensities of phospho-GEF-H1 in the axon (d), the cell body (e) and minor neurites (f) (PBS= 10, NT-3= 12 neurons from 3 independent experiments).

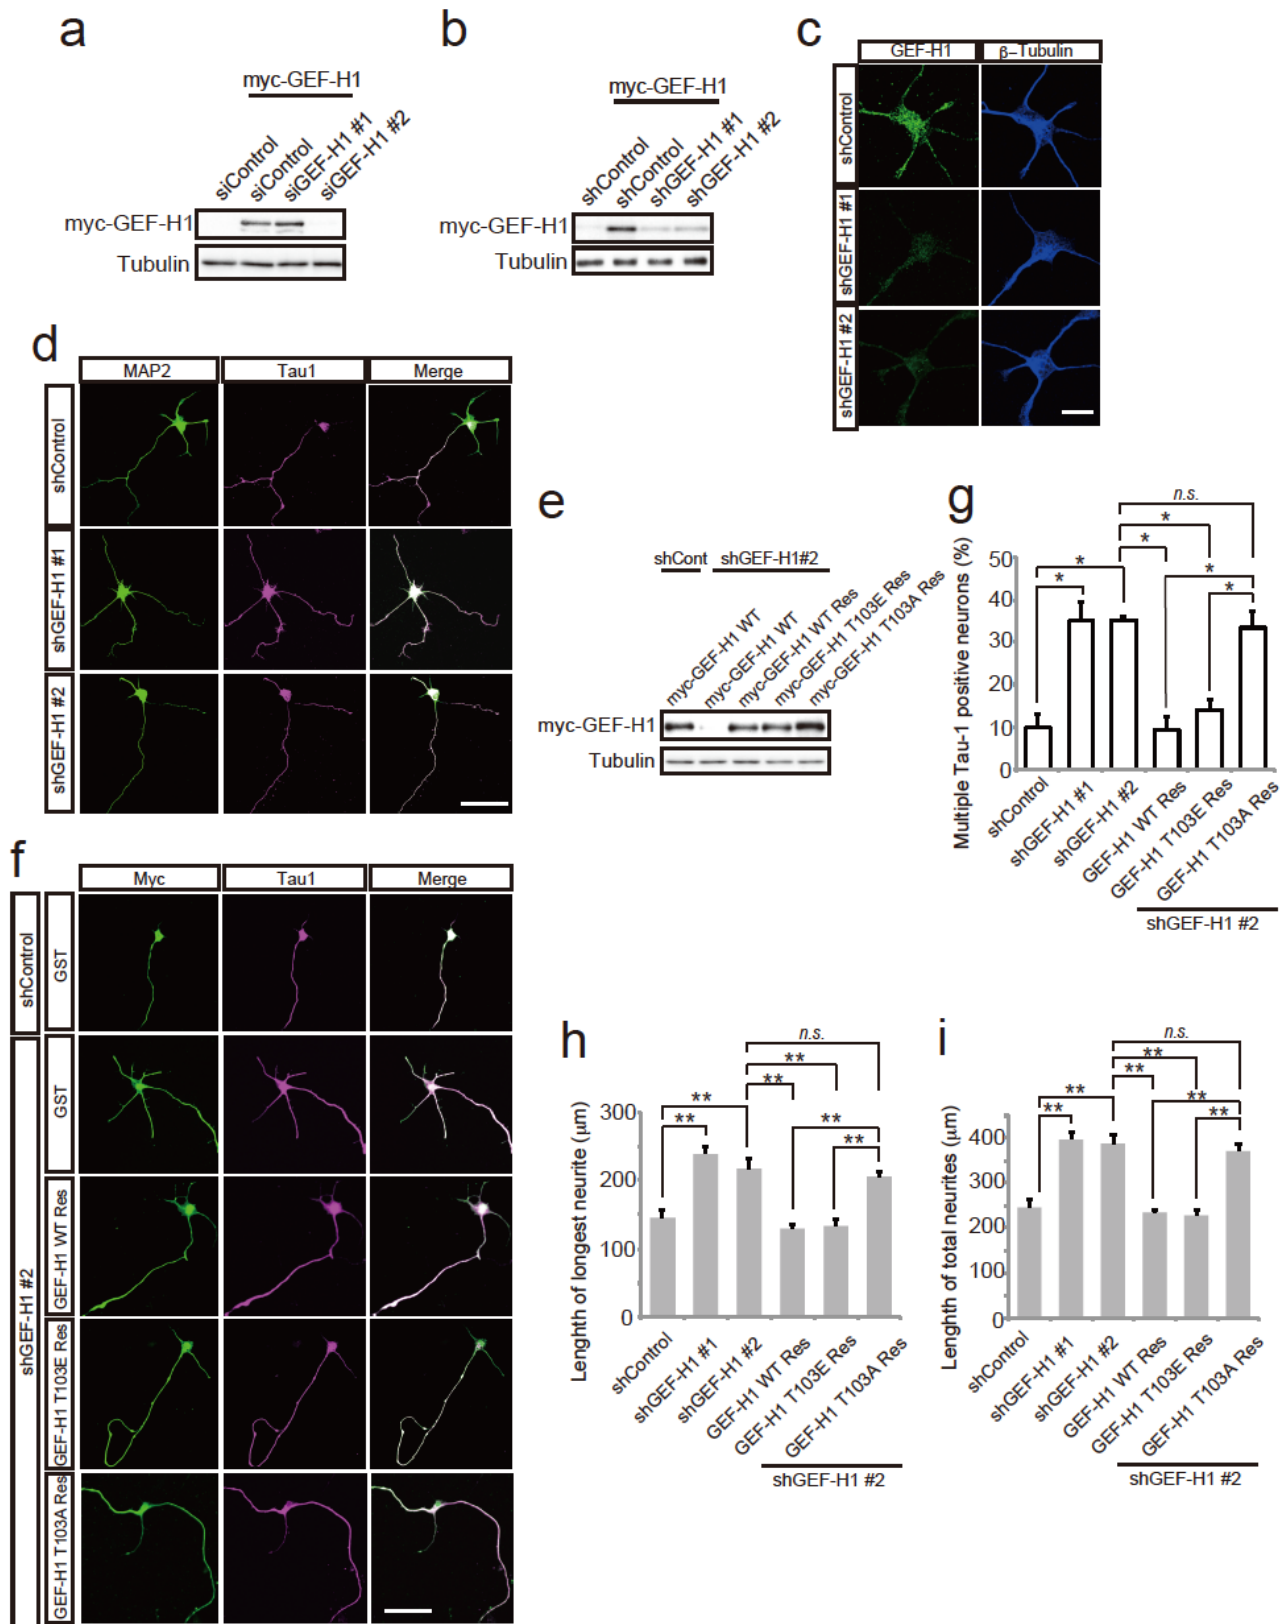

**Supplementary Figure 8. The effect of GEF-H1 knockdown on neuronal polarization** (a) Immunoblots showing knockdown of GEF-H1 with siRNA. Scramble siRNA (siControl), siRNA-GEF-H1#1 (siGEF-H1#1) or siRNA-GEF-H1#2 (siGEF-H1#2) was co-transfected with myc-GEF-H1 into Neuro2a cells. The cells were subjected to immunoblot analysis with an anti-myc antibody. Tubulin was used as a loading control. (b) Immunoblots revealing knockdown of GEF-H1 with shRNA. pSico-mCherry

(shControl), pSico-mCherry-shGEF-H1 #1, and -shGEF-H1 #2 were co-transfected with pEF-Cre and myc-GEF-H1 into Neuro2a cells. The cells were subjected to immunoblot analysis with an anti-myc antibody. Tubulin was used as a loading control. (c) Immunostaining showing knockdown of GEF-H1 in neurons. pSico-mCherry, pSico-mCherry-shGEF-H1#1 or pSico-mCherry-shGEF-H1#2 was co-transfected with T $\alpha$ -Cre into hippocampal neurons at 3 DIV. The cells were immunostained with anti-GEF-H1 (left) and anti-class III  $\beta$  tubulin (right) antibodies. Scale bar, 20  $\mu$  m. (d) pSico-mCherry, pSico-mCherry-shGEF-H1#1 or pSico-mCherry-shGEF-H1#2 was co-transfected with T $\alpha$ -Cre into hippocampal neurons at 3 DIV. Representative images of the neurons at 4 DIV are shown. Scale bar, 50  $\mu$  m. (e) myc-GEF-H1 WT or shRNA-resistant forms of GEF-H1 were co-transfected into Neuro2a cells with pSico-mCherry or pSico-mCherry-shGEF-H1 #2 and pEF-Cre. The cells were subjected to immunoblot analysis with an anti-myc antibody. Tubulin was used as a loading control. (f) Hippocampal neurons were co-transfected with pSico-mCherry, pSico-mCherry-shGEF-H1#1 or pSico-mCherry-shGEF-H1#2 and shRNA-resistant forms of GEF-H1 at 3 DIV. Representative images of the neurons at 4 DIV are shown. Scale bar, 50  $\mu$  m. (g) Percentages of neurons with multiple Tau-1-positive axons. (h-i) The lengths of the longest neurite (h) and the total neurites (i) were determined (shCont= 90, shGEF-H1#1= 90, shGEF-H1#2= 90, GEF-H WT Res= 90, GEF-H1 T103E Res= 90, GEF-H1 T103A Res= 90 neurons from 3 independent experiments). Error bars represent the SEM. \*P < 0.05 and \*\*P < 0.01.

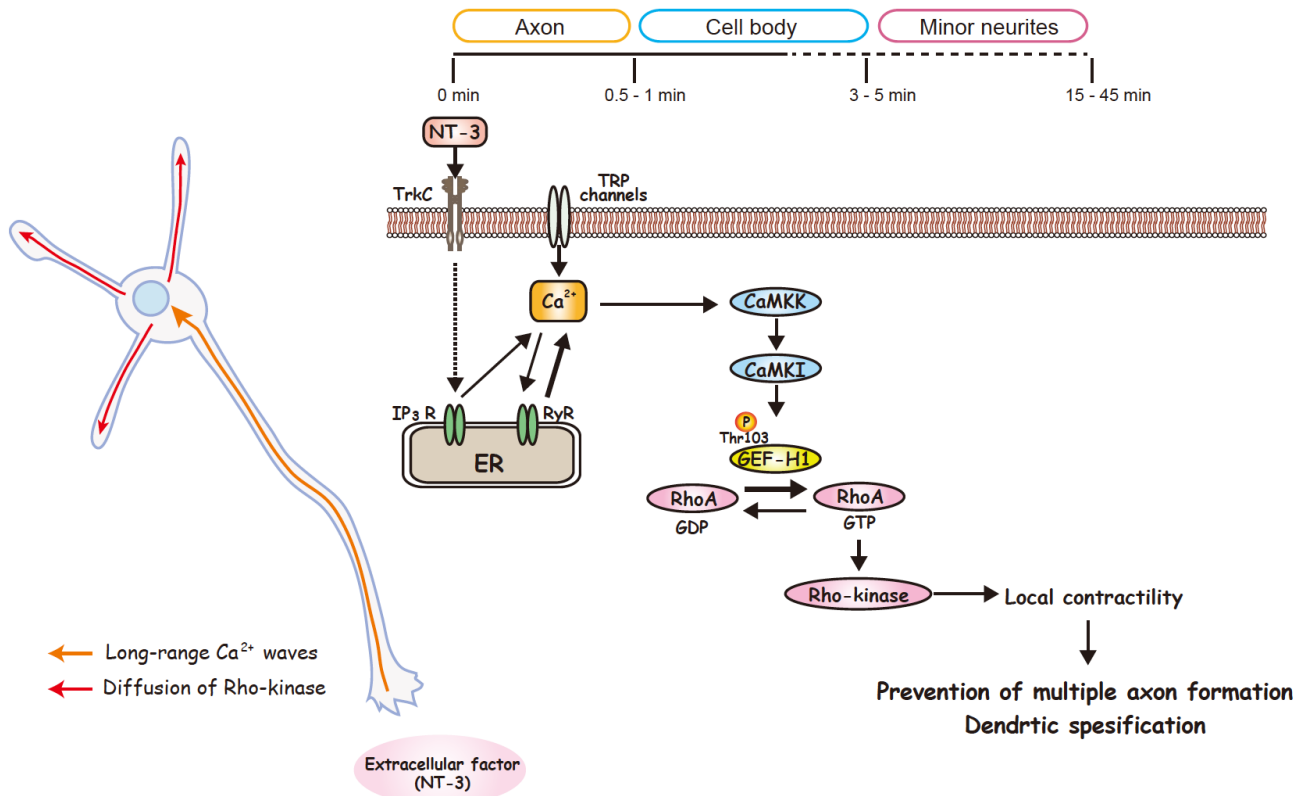

**Supplementary Figure 9. Long-range inhibitory signaling regulates axon/dendrite polarity** A working model of long-range inhibitory signaling for neuronal polarization. Once the axon is determined, amplification of NT-3 generates long-range  $Ca^{2+}$  waves from the axon to the cell body in a CICR-dependent manner. The long-range  $Ca^{2+}$  waves activate CaMKI, which subsequently phosphorylates GEF-H1 in the cell body. Phosphorylation of GEF-H1 induces polarized activation of RhoA/Rho-kinase, thereby activating Rho-kinase to diffuse to all minor neurites, preventing the other minor neurites from forming an axon and maintaining a future dendrite identity.

Fig. 6b

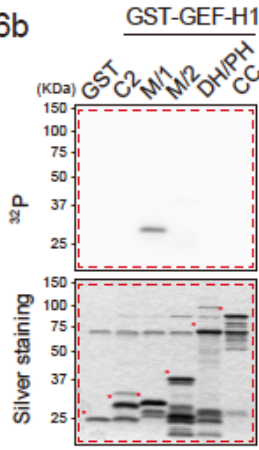

Fig. 6d

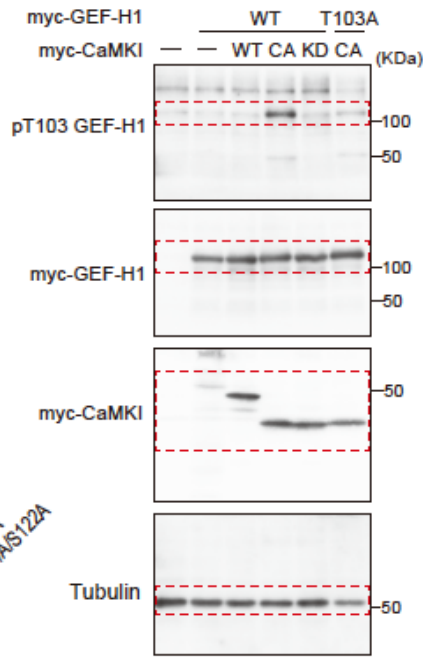

Fig. 6e

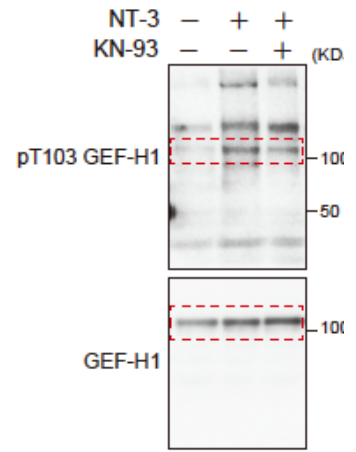

Fig. 6c

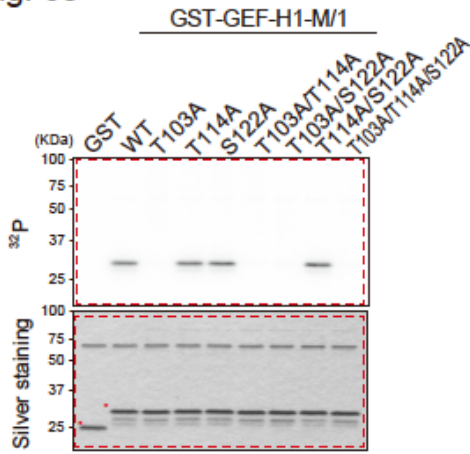

Fig. 7c

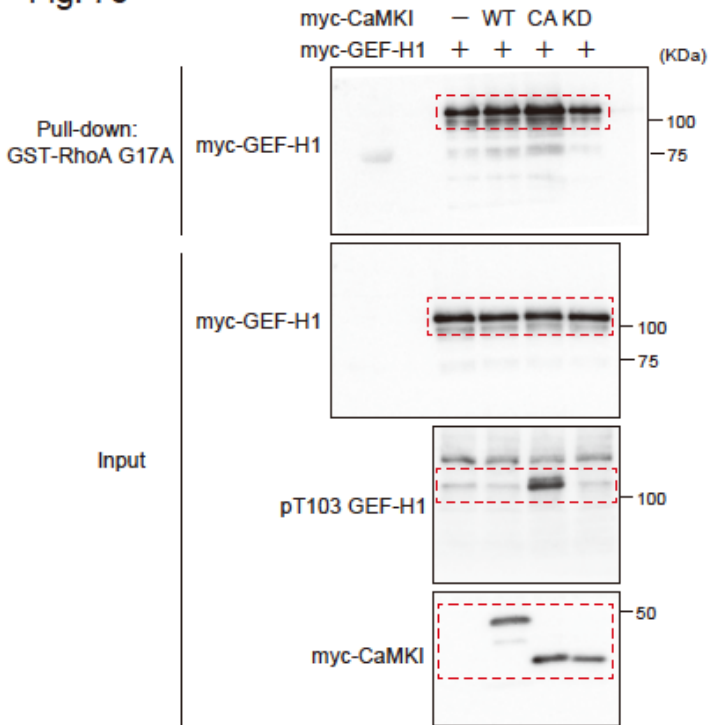

Fig. 7e

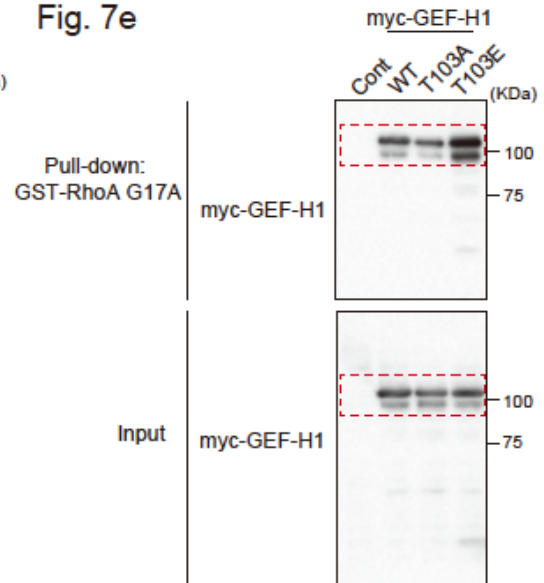

Supplementary Figure 10. Images of full-length blots

**Supplementary Table 1: primers for the GEF-H1 mutants**

| Constructs               | Primers                                                                                      |
|--------------------------|----------------------------------------------------------------------------------------------|
| GEF-H1 C1                | Forward 5'-ccagatcatgtctcggatcgaatccctc-3'<br>Reverse 5'-ccagatcttaggccagggtgtctttacagc -3'  |
| GEF-H1 M/1               | Forward 5'-ggagatctaactgtaccaaggcaagcag-3'<br>Reverse 5'-ccagatctttagaagctgtcggaagggtaaat-3' |
| GEF-H1 M/2               | Forward 5'-ggagatctcggcagtcacctcctggg-3'<br>Reverse 5'-ggagatctttacaggaagctgctgtccacg-3'     |
| GEF-H1 DH/PH             | Forward 5'-ggagatccagcagcacaaaaaggaagtg-3'<br>Reverse 5'-ggagatctttaaagtctcctcctggacggg-3'   |
| GEF-H1 CC                | Forward 5'-ggagatctcctctgatcgagacagagg-3'<br>Reverse 5'-ggagatctttagctctctgaagctgtgg -3'     |
| GEF-H1-T103A             | Forward 5'-ggaacaacgctgctttgcagtctgtctccc-3'<br>Reverse 5'-gcaaagcagcgttgctcctcagcagtgag-3'  |
| GEF-H1-T114A             | Forward 5'-gaagtaaggcgaccaccagagagcggcca-3'<br>Reverse 5'-tggtggtcgccttacttcgaaggagacag-3'   |
| GEF-H1-S122A             | Forward 5'-gccaacggctgccatttacccttccgac-3'<br>Reverse 5'-taaatggcagccgttgccgctctctggt-3'     |
| GEF-H1-T103E             | Forward 5'-ggaacaacgaggctttgcagtctgtctccc-3'<br>Reverse 5'-gcaaagcctcgttgctcctcagcagtgag-3'  |
| shGEF-H1 #2<br>Resistant | Forward 5'-actggaatgctagaagaattgcagat-3'<br>Reverse 5'-atctgcaattcttctagcattccagt-3'         |

**Supplementary Table 2: summary of statistical analysis**

| Figure | Panel                                                                                                                                                                                                                                                                                                                                                                                                                                                                                                                                                                                                                                                                                                                                                                                            | Number of sample                                                                                                                                                                                          | Test used                     | Post-hoc test                                                  | Significance                                                                                                                                                                                                                                                                                                                                                                                                                                                                                                                                                       | Effect size                                                                                                                                                                                                              |
|--------|--------------------------------------------------------------------------------------------------------------------------------------------------------------------------------------------------------------------------------------------------------------------------------------------------------------------------------------------------------------------------------------------------------------------------------------------------------------------------------------------------------------------------------------------------------------------------------------------------------------------------------------------------------------------------------------------------------------------------------------------------------------------------------------------------|-----------------------------------------------------------------------------------------------------------------------------------------------------------------------------------------------------------|-------------------------------|----------------------------------------------------------------|--------------------------------------------------------------------------------------------------------------------------------------------------------------------------------------------------------------------------------------------------------------------------------------------------------------------------------------------------------------------------------------------------------------------------------------------------------------------------------------------------------------------------------------------------------------------|--------------------------------------------------------------------------------------------------------------------------------------------------------------------------------------------------------------------------|
| 1e     | Axon outgrowth                                                                                                                                                                                                                                                                                                                                                                                                                                                                                                                                                                                                                                                                                                                                                                                   | PBS= 14, NT-3= 15, BDNF= 16 neurons from 3 independent experiments.                                                                                                                                       | One-way ANOVA                 | Dunnett's multiple comparison                                  | PBS vs NT-3 or BDNF, p<0.01                                                                                                                                                                                                                                                                                                                                                                                                                                                                                                                                        | Cohen's d =1.75 (NT-3), Large<br>Cohen's d =1.22 (BDNF), Large                                                                                                                                                           |
| 1f     | Minor neurite outgrowth                                                                                                                                                                                                                                                                                                                                                                                                                                                                                                                                                                                                                                                                                                                                                                          | PBS= 45, NT-3= 39, BDNF= 31 neurites from 3 independent experiments.                                                                                                                                      | One-way ANOVA                 | Dunnett's multiple comparison                                  | PBS vs NT-3 or BDNF, p<0.05                                                                                                                                                                                                                                                                                                                                                                                                                                                                                                                                        | Cohen's d =0.78 (NT-3), Medium<br>Cohen's d =0.78 (BDNF), Medium                                                                                                                                                         |
| 2b     | Ca <sup>2+</sup> propagation                                                                                                                                                                                                                                                                                                                                                                                                                                                                                                                                                                                                                                                                                                                                                                     | PBS= 10, NT-3= 16, XestospingonC= 9, Ryanodine= 15, Dantrolene= 18, SKF96365= 12 neurons from 3 independent experiments.                                                                                  | One-way ANOVA                 | Dunnett's multiple comparison                                  | PBS vs NT-3, p<0.05                                                                                                                                                                                                                                                                                                                                                                                                                                                                                                                                                | Cohen's d =1.77, Large                                                                                                                                                                                                   |
| 2c     | Minor neurite outgrowth                                                                                                                                                                                                                                                                                                                                                                                                                                                                                                                                                                                                                                                                                                                                                                          | PBS= 21, NT-3= 21, XestospingonC= 26, Ryanodine= 25, Dantrolene= 25, SKF96365= 24 neurites from 3 independent experiments.                                                                                | One-way ANOVA                 | Dunnett's multiple comparison                                  | PBS vs NT-3, p<0.05                                                                                                                                                                                                                                                                                                                                                                                                                                                                                                                                                | Cohen's d =0.94, Large                                                                                                                                                                                                   |
| 2d     | Axon outgrowth                                                                                                                                                                                                                                                                                                                                                                                                                                                                                                                                                                                                                                                                                                                                                                                   | PBS= 7, NT-3= 9, XestospingonC= 9, Ryanodine= 9, Dantrolene= 8, SKF96365= 8 neurons from 3 independent experiments.                                                                                       | One-way ANOVA                 | Dunnett's multiple comparison                                  | PBS vs NT-3, Ryanodine, Dantrolene or SKF96365 p<0.05                                                                                                                                                                                                                                                                                                                                                                                                                                                                                                              | Cohen's d =1.90 (NT-3), Large<br>Cohen's d =1.39 (Ryanodine), Large<br>Cohen's d =1.16 (Dantrolene), Large<br>Cohen's d =1.21 (SKF96365), Large                                                                          |
| 2f     | Minor neurite outgrowth                                                                                                                                                                                                                                                                                                                                                                                                                                                                                                                                                                                                                                                                                                                                                                          | PBS= 27, NT-3= 31, BAPTA= 47, STO-609= 45, KN-93= 40 neurites from 3 independent experiments.                                                                                                             | One-way ANOVA                 | Dunnett's multiple comparison                                  | PBS vs NT-3, p<0.01                                                                                                                                                                                                                                                                                                                                                                                                                                                                                                                                                | Cohen's d =0.92, Large                                                                                                                                                                                                   |
| 2g     | Minor neurite outgrowth                                                                                                                                                                                                                                                                                                                                                                                                                                                                                                                                                                                                                                                                                                                                                                          | DMSO= 42, XestospingonC= 32, Ryanodine= 37, Dantrolene= 35, SKF96365= 32 neurons from 3 independent experiments.                                                                                          | One-way ANOVA                 | Dunnett's multiple comparison                                  | DMSO vs Xestospingon C or Ryanodine, p<0.01; DMSO vs Dantrolene or SKF96365, p<0.05                                                                                                                                                                                                                                                                                                                                                                                                                                                                                | Cohen's d =0.98 (Xestospingon C), Large<br>Cohen's d =1.09 (Ryanodine), Large<br>Cohen's d =0.5 (Dantrolene), Medium<br>Cohen's d =0.56 (SKF96365), Medium                                                               |
| 2h     | Axon outgrowth                                                                                                                                                                                                                                                                                                                                                                                                                                                                                                                                                                                                                                                                                                                                                                                   | DMSO= 14, XestospingonC= 11, Ryanodine= 13, Dantrolene= 13, SKF96365= 12 neurons from 3 independent experiments.                                                                                          | One-way ANOVA                 | Dunnett's multiple comparison                                  | DMSO vs Xestospingon C, p<0.01                                                                                                                                                                                                                                                                                                                                                                                                                                                                                                                                     | Cohen's d =1.05, Large                                                                                                                                                                                                   |
| 3c     | Minor neurite outgrowth                                                                                                                                                                                                                                                                                                                                                                                                                                                                                                                                                                                                                                                                                                                                                                          | DMSO (PBS)= 16, DMSO (NT-3)= 22, C3= 23, Y-27632= 25, Blebbistatin= 22 neurites from 3 independent experiments.                                                                                           | One-way ANOVA                 | Dunnett's multiple comparison                                  | DMSO (PBS) vs DMSO (NT-3), p<0.05                                                                                                                                                                                                                                                                                                                                                                                                                                                                                                                                  | Cohen's d =1.75, Large                                                                                                                                                                                                   |
| 3d     | FRET efficiency                                                                                                                                                                                                                                                                                                                                                                                                                                                                                                                                                                                                                                                                                                                                                                                  | DMSO (PBS)= 37, DMSO (NT-3)= 37, BAPTA= 37, STO-609= 37, KN-93= 37 neurons from 3 independent experiments.                                                                                                | One-way ANOVA                 | Dunnett's multiple comparison                                  | DMSO (PBS) vs DMSO (NT-3), p<0.001                                                                                                                                                                                                                                                                                                                                                                                                                                                                                                                                 | Cohen's d>2.0, Large                                                                                                                                                                                                     |
| 3g     | LOVTRAP-Cont vs LOVTRAP-RhoA<br>Photoactivation for 10 min<br>LOVTRAP-Rho-kinase CA= 44, LOVTRAP-Rho-kinase CAT KD= 36 neurites from 5 independent experiments.<br>Photoactivation for 20 min<br>LOVTRAP-Cont vs LOVTRAP-RhoA or LOVTRAP-Rho-kinase CAT, p<0.01<br>Photoactivation for 30 min<br>LOVTRAP-Cont vs LOVTRAP-RhoA or LOVTRAP-Rho-kinase CAT, p<0.01<br>Photoactivation for 40 min<br>LOVTRAP-Cont vs LOVTRAP-RhoA or LOVTRAP-Rho-kinase CAT, p<0.01<br>Photoactivation for 50 min<br>LOVTRAP-Cont vs LOVTRAP-RhoA or LOVTRAP-Rho-kinase CAT, p<0.01<br>Photoactivation for 60 min<br>LOVTRAP-Cont vs LOVTRAP-RhoA or LOVTRAP-Rho-kinase CAT, p<0.01<br>After photoactivation<br>LOVTRAP-Cont vs LOVTRAP-RhoA, p<0.05; LOVTRAP-Cont vs LOVTRAP-Rho-kinase CAT, p<0.01                 | One-way ANOVA                                                                                                                                                                                             | Dunnett's multiple comparison | LOVTRAP-Cont vs LOVTRAP-RhoA or LOVTRAP-Rho-kinase CAT, p<0.01 | Cohen's d =1.01 (LOVTRAP-RhoA), Large<br>Cohen's d =0.7 (LOVTRAP-Rho-kinase CAT), Medium<br>Cohen's d =1.37 (LOVTRAP-RhoA), Large<br>Cohen's d =1.2 (LOVTRAP-Rho-kinase CAT), Large<br>Cohen's d =1.5 (LOVTRAP-RhoA), Large<br>Cohen's d =1.41 (LOVTRAP-Rho-kinase CAT), Large<br>Cohen's d =1.89 (LOVTRAP-RhoA), Large<br>Cohen's d =1.72 (LOVTRAP-Rho-kinase CAT), Large<br>Cohen's d =1.72 (LOVTRAP-RhoA), Large<br>Cohen's d =1.72 (LOVTRAP-Rho-kinase CAT), Large<br>Cohen's d =1.16 (LOVTRAP-RhoA), Large<br>Cohen's d =1.05 (LOVTRAP-Rho-kinase CAT), Large |                                                                                                                                                                                                                          |
| 3i     | Axon outgrowth<br>Photoactivation for 10 min<br>LOVTRAP-Cont= 8, LOVTRAP-RhoA= 9, LOVTRAP-Rho-kinase CA=9, LOVTRAP-Rho-kinase CAT KD= 9 neurons from 3 independent experiments.<br>Photoactivation for 20 min<br>LOVTRAP-Cont vs LOVTRAP-RhoA, p<0.01; LOVTRAP-Cont vs LOVTRAP-Rho-kinase CAT, p<0.05<br>Photoactivation for 30 min<br>LOVTRAP-Cont vs LOVTRAP-RhoA or LOVTRAP-Rho-kinase CAT, p<0.05<br>Photoactivation for 40 min<br>LOVTRAP-Cont vs LOVTRAP-RhoA or LOVTRAP-Rho-kinase CAT, p<0.05<br>Photoactivation for 50 min<br>LOVTRAP-Cont vs LOVTRAP-RhoA or LOVTRAP-Rho-kinase CAT, p<0.05<br>Photoactivation for 60 min<br>LOVTRAP-Cont vs LOVTRAP-RhoA or LOVTRAP-Rho-kinase CAT, p<0.05<br>After photoactivation<br>LOVTRAP-Cont vs LOVTRAP-RhoA or LOVTRAP-Rho-kinase CAT, p<0.05 | One-way ANOVA                                                                                                                                                                                             | Dunnett's multiple comparison | LOVTRAP-Cont vs LOVTRAP-Rho-kinase CAT, p<0.01                 | Cohen's d =1.57 (LOVTRAP-Rho-kinase CAT), Large<br>Cohen's d>2.0 (LOVTRAP-RhoA), Large<br>Cohen's d =1.90 (LOVTRAP-Rho-kinase CAT), Large<br>Cohen's d>2.0 (LOVTRAP-RhoA), Large<br>Cohen's d =1.89 (LOVTRAP-Rho-kinase CAT), Large<br>Cohen's d>2.0 (LOVTRAP-RhoA), Large<br>Cohen's d>2.0 (LOVTRAP-Rho-kinase CAT), Large<br>Cohen's d>2.0 (LOVTRAP-RhoA), Large<br>Cohen's d>2.0 (LOVTRAP-Rho-kinase CAT), Large<br>Cohen's d>2.0 (LOVTRAP-RhoA), Large<br>Cohen's d>2.0 (LOVTRAP-Rho-kinase CAT), Large                                                        |                                                                                                                                                                                                                          |
| 5b     | Minor neurite outgrowth                                                                                                                                                                                                                                                                                                                                                                                                                                                                                                                                                                                                                                                                                                                                                                          | Cont= 17, Y-27632= 14, C3= 13, Blebbistatin= 7 neurons from 3 independent experiments.                                                                                                                    | One-way ANOVA                 | Dunnett's multiple comparison                                  | Cont vs Y-27632, p<0.01; Cont vs C3 or Blebbistatin, p<0.05                                                                                                                                                                                                                                                                                                                                                                                                                                                                                                        | Cohen's d=1.62 (Y-27632), Large<br>Cohen's d=0.95 (C3), Large<br>Cohen's d=1.38 (Blebbistatin), Large                                                                                                                    |
| 5d     | Multiple axon formation                                                                                                                                                                                                                                                                                                                                                                                                                                                                                                                                                                                                                                                                                                                                                                          | Cont= 91, Y-27632= 90, C3= 90, Blebbistatin= 91 neurons from 3 independent experiments.                                                                                                                   | One-way ANOVA                 | Dunnett's multiple comparison                                  | Cont vs Y-27632, C3 or Blebbistatin, p<0.01                                                                                                                                                                                                                                                                                                                                                                                                                                                                                                                        | Cohen's d>2.0 (Y-27632), Large<br>Cohen's d>2.0 (C3), Large<br>Cohen's d>2.0 (Blebbistatin), Large                                                                                                                       |
| 5e     | Length of multiple axons                                                                                                                                                                                                                                                                                                                                                                                                                                                                                                                                                                                                                                                                                                                                                                         | Cont vs Y-27632, C3 or Blebbistatin, p<0.05                                                                                                                                                               | One-way ANOVA                 | Dunnett's multiple comparison                                  | Cont vs Y-27632, C3 or Blebbistatin, p<0.05                                                                                                                                                                                                                                                                                                                                                                                                                                                                                                                        | Cohen's d>2.0 (Blebbistatin), Large<br>Cohen's d>2.0 (C3), Medium<br>Cohen's d=0.69 (C3), Medium<br>Cohen's d=0.74 (Blebbistatin), Medium                                                                                |
| 5f     | Length of longest neurite                                                                                                                                                                                                                                                                                                                                                                                                                                                                                                                                                                                                                                                                                                                                                                        | Cont vs Y-27632, C3 or Blebbistatin, p<0.01                                                                                                                                                               | One-way ANOVA                 | Dunnett's multiple comparison                                  | Cont vs Y-27632, C3 or Blebbistatin, p<0.01                                                                                                                                                                                                                                                                                                                                                                                                                                                                                                                        | Cohen's d>2.0 (Y-27632), Large<br>Cohen's d>2.0 (C3), Large<br>Cohen's d>2.0 (Blebbistatin), Large                                                                                                                       |
| 5g     | Length of total neurites                                                                                                                                                                                                                                                                                                                                                                                                                                                                                                                                                                                                                                                                                                                                                                         | Cont vs Y-27632, C3 or Blebbistatin, p<0.01                                                                                                                                                               | One-way ANOVA                 | Dunnett's multiple comparison                                  | Cont vs Y-27632, C3 or Blebbistatin, p<0.01                                                                                                                                                                                                                                                                                                                                                                                                                                                                                                                        | Cohen's d>2.0 (Y-27632), Large<br>Cohen's d>2.0 (C3), Large<br>Cohen's d>2.0 (Blebbistatin), Large                                                                                                                       |
| 6e     | pT103 GEF-H1                                                                                                                                                                                                                                                                                                                                                                                                                                                                                                                                                                                                                                                                                                                                                                                     | GEF-H1= 3, GEF-H1 + CaMKI WT= 3, GEF-H1 + CaMKI CA= 3, GEF-H1 + CaMKI KD= 3, GEF-H1 T103A + CaMKI CA = 3 independent experiments                                                                          | One-way ANOVA                 | Dunnett's multiple comparison                                  | GEF-H1 vs GEF-H1 + CaMKI CA, p<0.05                                                                                                                                                                                                                                                                                                                                                                                                                                                                                                                                | Cohen's d>2.0, Large                                                                                                                                                                                                     |
| 6g     | pT103 GEF-H1                                                                                                                                                                                                                                                                                                                                                                                                                                                                                                                                                                                                                                                                                                                                                                                     | Cont= 3, NT-3= 3, NT-3 + KN-93 = 3 independent experiments                                                                                                                                                | One-way ANOVA                 | Dunnett's multiple comparison                                  | Cont vs NT-3, p<0.05                                                                                                                                                                                                                                                                                                                                                                                                                                                                                                                                               | Cohen's d>2.0, Large                                                                                                                                                                                                     |
| 7a     | Minor neurite outgrowth                                                                                                                                                                                                                                                                                                                                                                                                                                                                                                                                                                                                                                                                                                                                                                          | siCont/PBS= 29, siCont/NT-3= 26, siGEF-H1#2/PBS= 23, siGEF-H1#2/NT-3= 26 neurites from 3 independent experiments.                                                                                         | One-way ANOVA                 | Dunnett's multiple comparison                                  | siCont/PBS or siGEF-H1#2/NT-3 vs siCont/NT-3, p<0.01                                                                                                                                                                                                                                                                                                                                                                                                                                                                                                               | Cohen's d=1.19 (siCont/NT-3), Large                                                                                                                                                                                      |
| 7b     | FRET efficiency                                                                                                                                                                                                                                                                                                                                                                                                                                                                                                                                                                                                                                                                                                                                                                                  | siCont/PBS= 5, siCont/NT-3= 8, siGEF-H1#2/PBS= 6, siGEF-H1#2/NT-3= 15 neurons from 3 independent experiments.                                                                                             | One-way ANOVA                 | Dunnett's multiple comparison                                  | siCont/PBS vs siCont/NT-3, p<0.01                                                                                                                                                                                                                                                                                                                                                                                                                                                                                                                                  | Cohen's d=1.07 (siCont/NT-3), Large<br>Cohen's d=0.74 (siGEF-H1/NT-3), Medium                                                                                                                                            |
| 7d     | GEF activity                                                                                                                                                                                                                                                                                                                                                                                                                                                                                                                                                                                                                                                                                                                                                                                     | Cont= 4, CaMKI WT= 4, CaMKI CA= 4, CaMKI KD= 4 independent experiments                                                                                                                                    | One-way ANOVA                 | Dunnett's multiple comparison                                  | Cont vs CaMKI CA, p<0.05                                                                                                                                                                                                                                                                                                                                                                                                                                                                                                                                           | Cohen's d>2.0, Large                                                                                                                                                                                                     |
| 7f     | GEF activity                                                                                                                                                                                                                                                                                                                                                                                                                                                                                                                                                                                                                                                                                                                                                                                     | GEF-H1 WT= 4, GEF-H1 T103A= 4, GEF-H1 T103E = 4 independent experiments                                                                                                                                   | One-way ANOVA                 | Dunnett's multiple comparison                                  | GEF-H1 WT vs GEF-H1 T103E, p<0.01                                                                                                                                                                                                                                                                                                                                                                                                                                                                                                                                  | Cohen's d>2.0, Large                                                                                                                                                                                                     |
| 7h     | Multiple axon formation                                                                                                                                                                                                                                                                                                                                                                                                                                                                                                                                                                                                                                                                                                                                                                          | GST= 86, GEF-H1 WT= 90, GEF-H1 T103E= 88, GEF-H1 T103A= 90 neurons from 3 independent experiments.                                                                                                        | One-way ANOVA                 | Dunnett's multiple comparison                                  | GEF-H1 WT vs GEF-H1 T103A, p<0.01                                                                                                                                                                                                                                                                                                                                                                                                                                                                                                                                  | Cohen's d>2.0, Large                                                                                                                                                                                                     |
| 7i     | Length of multiple axons                                                                                                                                                                                                                                                                                                                                                                                                                                                                                                                                                                                                                                                                                                                                                                         | GST vs GEF-H1 T103E or GEF-H1 T103A, p<0.05                                                                                                                                                               | One-way ANOVA                 | Dunnett's multiple comparison                                  | GST vs GEF-H1 T103E or GEF-H1 T103A, p<0.05                                                                                                                                                                                                                                                                                                                                                                                                                                                                                                                        | Cohen's d>2.0 (GEF-H1 T103E), Large<br>Cohen's d=1.18 (GEF-H1 T103A), Large                                                                                                                                              |
| 7j     | Length of longest neurite                                                                                                                                                                                                                                                                                                                                                                                                                                                                                                                                                                                                                                                                                                                                                                        | GST vs GEF-H1 T103E or GEF-H1 T103A, p<0.05                                                                                                                                                               | One-way ANOVA                 | Dunnett's multiple comparison                                  | GST vs GEF-H1 T103E or GEF-H1 T103A, p<0.05                                                                                                                                                                                                                                                                                                                                                                                                                                                                                                                        | Cohen's d>2.0 (GEF-H1 T103E), Large<br>Cohen's d>2.0 (GEF-H1 T103A), Large                                                                                                                                               |
| 7k     | Length of total neurites                                                                                                                                                                                                                                                                                                                                                                                                                                                                                                                                                                                                                                                                                                                                                                         | GST vs GEF-H1 T103E or GEF-H1 T103A, p<0.05                                                                                                                                                               | One-way ANOVA                 | Dunnett's multiple comparison                                  | GST vs GEF-H1 T103E or GEF-H1 T103A, p<0.05                                                                                                                                                                                                                                                                                                                                                                                                                                                                                                                        | Cohen's d>2.0 (GEF-H1 T103E), Large<br>Cohen's d>2.0 (GEF-H1 T103A), Large                                                                                                                                               |
| 8b     | Distribution of cells in vivo                                                                                                                                                                                                                                                                                                                                                                                                                                                                                                                                                                                                                                                                                                                                                                    | pTg-LPL-EGFP= 6, pTg-LPL-GEF-H1-WT= 9, pTg-LPL-GEF-H1-T103E = 9, pTg-LPL-GEF-H1-T103A = 4 brains from 3 independent experiments.                                                                          | One-way ANOVA                 | Tukey's multiple comparison                                    | Cont vs GEF-H1WT, T103E or GEF-H1 T103A, p<0.01                                                                                                                                                                                                                                                                                                                                                                                                                                                                                                                    | Cohen's d>2.0 (GEF-H1 WT), Large<br>Cohen's d>2.0 (GEF-H1 T103E), Large<br>Cohen's d>2.0 (GEF-H1 T103A), Large                                                                                                           |
| 8c     | Morphology of cells in vivo                                                                                                                                                                                                                                                                                                                                                                                                                                                                                                                                                                                                                                                                                                                                                                      | Cont vs GEF-H1WT, T103E or GEF-H1 T103A, p<0.01                                                                                                                                                           | One-way ANOVA                 | Tukey's multiple comparison                                    | Cont vs GEF-H1WT, T103E or GEF-H1 T103A, p<0.01                                                                                                                                                                                                                                                                                                                                                                                                                                                                                                                    | Cohen's d>2.0 (GEF-H1 WT), Large<br>Cohen's d>2.0 (GEF-H1 T103E), Large<br>Cohen's d>2.0 (GEF-H1 T103A), Large                                                                                                           |
| 8d     | Trailing process formation                                                                                                                                                                                                                                                                                                                                                                                                                                                                                                                                                                                                                                                                                                                                                                       | Cont vs GEF-H1 WT or GEF-H1 T103E, p<0.01                                                                                                                                                                 | One-way ANOVA                 | Tukey's multiple comparison                                    | Cont vs GEF-H1 WT or GEF-H1 T103E, p<0.01                                                                                                                                                                                                                                                                                                                                                                                                                                                                                                                          | Cohen's d>2.0 (GEF-H1 WT), Large<br>Cohen's d>2.0 (GEF-H1 T103E), Large                                                                                                                                                  |
| 8e     | Leading process formation                                                                                                                                                                                                                                                                                                                                                                                                                                                                                                                                                                                                                                                                                                                                                                        | Cont vs GEF-H1 WT, GEF-H1 T103E, GEF-H1 T103A, p<0.01                                                                                                                                                     | One-way ANOVA                 | Tukey's multiple comparison                                    | Cont vs GEF-H1 WT, GEF-H1 T103E, GEF-H1 T103A, p<0.01                                                                                                                                                                                                                                                                                                                                                                                                                                                                                                              | Cohen's d>2.0 (GEF-H1 WT), Large<br>Cohen's d>2.0 (GEF-H1 T103E), Large<br>Cohen's d>2.0 (GEF-H1 T103A), Large                                                                                                           |
| 8g     | Distribution of cells in vivo                                                                                                                                                                                                                                                                                                                                                                                                                                                                                                                                                                                                                                                                                                                                                                    | pSico-mCherry= 4, pSico-mCherry-shGEF-H1 #1= 8, pSico-mCherry-shGEF-H1 #2= 4, pTg-LPL-GEF-H1-WT Res= 5, pTg-LPL-GEF-H1-T103E Res= 13, pTg-LPL-GEF-H1-T103A Res= 10 brains from 3 independent experiments. | One-way ANOVA                 | Tukey's multiple comparison                                    | Cont vs shGEF-H1#1, shGEF-H1#2, GEF-H1 T103E Res or GEF-H1 T103A Res, p<0.01                                                                                                                                                                                                                                                                                                                                                                                                                                                                                       | Cohen's d>2.0 (shGEF-H1#1), Large<br>Cohen's d>2.0 (shGEF-H1#2), Large<br>Cohen's d>2.0 (T103E Res), Large<br>Cohen's d>2.0 (T103A Res), Large                                                                           |
| 8h     | Morphology of cells in vivo                                                                                                                                                                                                                                                                                                                                                                                                                                                                                                                                                                                                                                                                                                                                                                      | Cont vs shGEF-H1#1, shGEF-H1#2, GEF-H1 T103E Res or GEF-H1 T103A Res, p<0.01                                                                                                                              | One-way ANOVA                 | Tukey's multiple comparison                                    | Cont vs shGEF-H1#1, shGEF-H1#2, GEF-H1 T103E Res or GEF-H1 T103A Res, p<0.01                                                                                                                                                                                                                                                                                                                                                                                                                                                                                       | Cohen's d>2.0 (shGEF-H1#1), Large<br>Cohen's d>2.0 (shGEF-H1#2), Large<br>Cohen's d>2.0 (T103E Res), Large<br>Cohen's d>2.0 (T103A Res), Large                                                                           |
| 8i     | Trailing process formation                                                                                                                                                                                                                                                                                                                                                                                                                                                                                                                                                                                                                                                                                                                                                                       | Cont vs GEF-H1 T103E, p<0.01                                                                                                                                                                              | One-way ANOVA                 | Tukey's multiple comparison                                    | Cont vs GEF-H1 T103E, p<0.01                                                                                                                                                                                                                                                                                                                                                                                                                                                                                                                                       | Cohen's d>2.0 (T103E Res), Large<br>Cohen's d>2.0 (T103E Res), Large                                                                                                                                                     |
| 8j     | Leading process formation                                                                                                                                                                                                                                                                                                                                                                                                                                                                                                                                                                                                                                                                                                                                                                        | Cont vs shGEF-H1#1, shGEF-H1#2, GEF-H1 T103E Res or GEF-H1 T103A Res, p<0.01                                                                                                                              | One-way ANOVA                 | Tukey's multiple comparison                                    | Cont vs shGEF-H1#1, shGEF-H1#2, GEF-H1 T103E Res or GEF-H1 T103A Res, p<0.01                                                                                                                                                                                                                                                                                                                                                                                                                                                                                       | Cohen's d>2.0 (shGEF-H1#1), Large<br>Cohen's d>2.0 (shGEF-H1#2), Large<br>Cohen's d>2.0 (T103E Res), Large<br>Cohen's d>2.0 (T103A Res), Large                                                                           |
| S1     | Axon outgrowth<br>Local application for 30 min<br>Axon outgrowth<br>Local application for 40 min<br>Axon outgrowth<br>Local application for 50 min<br>Axon outgrowth<br>Local application for 60 min                                                                                                                                                                                                                                                                                                                                                                                                                                                                                                                                                                                             | anti-Cont= 13, anti-NT-3= 13 neurons from 3 independent experiments.                                                                                                                                      | Student's t-test              | anti-Cont vs anti-NT-3, p<0.01                                 | Cohen's d=1.54, Large                                                                                                                                                                                                                                                                                                                                                                                                                                                                                                                                              | Cohen's d=1.49, Large<br>Cohen's d=1.83, Large<br>Cohen's d=1.72, Large                                                                                                                                                  |
| S2b    | Minor neurite outgrowth                                                                                                                                                                                                                                                                                                                                                                                                                                                                                                                                                                                                                                                                                                                                                                          | DMSO= 67, ionomycin= 30 neurites from 3 independent experiments.                                                                                                                                          | Student's t-test              | DMSO vs ionomycin, p<0.05                                      | Cohen's d=0.52 (ionomycin), Medium                                                                                                                                                                                                                                                                                                                                                                                                                                                                                                                                 |                                                                                                                                                                                                                          |
| S2e    | Minor neurite outgrowth                                                                                                                                                                                                                                                                                                                                                                                                                                                                                                                                                                                                                                                                                                                                                                          | DMSO=59, ionomycin=33, BAPTA= 24, KN-93= 21 neurites from 3 independent experiments.                                                                                                                      | Student's t-test              | DMSO vs ionomycin, BAPTA or KN-93, p<0.05                      | Cohen's d=1.03 (ionomycin), Large<br>Cohen's d=0.67 (BAPTA), Medium<br>Cohen's d=0.87 (KN-93), Large                                                                                                                                                                                                                                                                                                                                                                                                                                                               |                                                                                                                                                                                                                          |
| S7e    | pGEF-H1                                                                                                                                                                                                                                                                                                                                                                                                                                                                                                                                                                                                                                                                                                                                                                                          | PBS= 10, NT-3= 12 neurons from 3 independent experiments.                                                                                                                                                 | Student's t-test              | PBS vs NT-3, p<0.05                                            | Cohen's d>2.0, Large                                                                                                                                                                                                                                                                                                                                                                                                                                                                                                                                               |                                                                                                                                                                                                                          |
| S8g    | Multiple axon formation                                                                                                                                                                                                                                                                                                                                                                                                                                                                                                                                                                                                                                                                                                                                                                          | shCont= 90, shGEF-H1#1= 90, shGEF-H1#2= 90, GEF-H1 WT Res= 90, GEF-H1T103E Res= 90, GEF-H1T103A Res= 90 neurons from 3 independent experiments.                                                           | One-way ANOVA                 | Tukey's multiple comparison                                    | shCont vs shGEF-H1#1, shGEF-H1#2, T103A Res, p<0.05                                                                                                                                                                                                                                                                                                                                                                                                                                                                                                                | Cohen's d>2.0 (shGEF-H1#1), Large<br>Cohen's d>2.0 (shGEF-H1#2), Large<br>Cohen's d>2.0 (T103A Res), Large<br>Cohen's d>2.0 (shGEF-H1#1), Large<br>Cohen's d>2.0 (shGEF-H1#2), Large<br>Cohen's d>2.0 (T103A Res), Large |
| S8h    | Length of longest neurite                                                                                                                                                                                                                                                                                                                                                                                                                                                                                                                                                                                                                                                                                                                                                                        | shCont vs shGEF-H1#1, shGEF-H1#2, T103A Res, p<0.01                                                                                                                                                       | One-way ANOVA                 | Tukey's multiple comparison                                    | shCont vs shGEF-H1#1, shGEF-H1#2, T103A Res, p<0.01                                                                                                                                                                                                                                                                                                                                                                                                                                                                                                                | Cohen's d>2.0 (shGEF-H1#1), Large<br>Cohen's d>2.0 (shGEF-H1#2), Large<br>Cohen's d>2.0 (T103A Res), Large                                                                                                               |
| S8i    | Length of total neurites                                                                                                                                                                                                                                                                                                                                                                                                                                                                                                                                                                                                                                                                                                                                                                         | shCont vs shGEF-H1#1, shGEF-H1#2, T103A Res, p<0.01                                                                                                                                                       | One-way ANOVA                 | Tukey's multiple comparison                                    | shCont vs shGEF-H1#1, shGEF-H1#2, T103A Res, p<0.01                                                                                                                                                                                                                                                                                                                                                                                                                                                                                                                | Cohen's d>2.0 (shGEF-H1#1), Large<br>Cohen's d>2.0 (shGEF-H1#2), Large<br>Cohen's d>2.0 (T103A Res), Large                                                                                                               |
